# Supplementary material for: Mediterranean Diet Adherence and Genetic Background Roles within a Web-Based Nutritional Intervention: The Food4Me Study
Source: MDPI journal article supplement (doi:10.3390/nu9101107), 2017-10-11
Supplement: s1 [file s1]

# Supplementary Materials: Mediterranean diet adherence and genetic background roles within a web-based nutritional intervention: the Food4Me study

Rodrigo San-Cristobal, Santiago Navas-Carretero, Katherine M Livingstone, Carlos Celis-Morales, Anna L Macready, Rosalind Fallaize, Clare B O'Donovan, Christina P. Lambrinou, George Moschonis, Cyril F.M. Marsaux, Yannis Manios, Mirosław Jarosz, Hannelore Daniel, Eileen R Gibney, Lorraine Brennan, Christian A Drevon, Thomas E Gundersen, Mike Gibney, Wim HM Saris, Julie A Lovegrove, Keith Grimaldi, Laurence D. Parnell, Jildau Bouwman, Ben van Ommen, John C Mathers, J. Alfredo Martinez, on behalf of the Food4Me Study.

## 2. Materials and Methods

**Table S1.** SNP distribution and Hardy-Weinberg test

| Gene          | Polymorphism | Common allele<br>/ Risk allele | Heterozygous (%) | Homozygous<br>for risk allele<br>(%) | X <sup>2</sup> † | p †              | Exact<br>significance |
|---------------|--------------|--------------------------------|------------------|--------------------------------------|------------------|------------------|-----------------------|
| <i>ADRB2</i>  | rs1042713    | G / A                          | 49.33            | 15.6                                 | 0.818            | 0.3659           | 0.3807                |
| <i>ADRB2</i>  | rs1042714    | C / G                          | 49.05            | 13.95                                | 1.642            | 0.2001           | 0.2121                |
| <i>AGT</i>    | rs5051       | C / T                          | 48.18            | 21                                   | 0.924            | 0.3365           | 0.3343                |
| <i>AGT</i>    | rs699        | T / C                          | 47.57            | 21.16                                | 1.884            | 0.1699           | 0.1716                |
| <i>APOA1</i>  | rs5069       | C / T                          | 6.74             | 0.08                                 | 0.178            | 0.6727           | 1                     |
| <i>APOA2</i>  | rs5082       | T / C                          | 44.17            | 15.62                                | 4.502            | <b>0.0339</b>    | <b>0.0358</b>         |
| <i>APOA5</i>  | rs662799     | A / G                          | 13.88            | 0.79                                 | 0.944            | 0.3313           | 0.3214                |
| <i>APOE</i>   | rs429358     | T / C                          | 24.54            | 2.06                                 | 0                | 0.9889           | 1                     |
| <i>APOE</i>   | rs7412       | T / C                          | 11.91            | 87.85                                | 0.79             | 0.3742           | 0.6233                |
| <i>BCMO1</i>  | rs6564851    | G / T                          | 49.64            | 28.55                                | 0.009            | 0.9263           | 0.9549                |
| <i>CETP</i>   | rs3764261    | G / T                          | 44.15            | 9.79                                 | 0.358            | 0.5496           | 0.6032                |
| <i>CETP</i>   | rs708272     | C / T                          | 45.99            | 21.6                                 | 6.057            | <b>0.0138</b>    | <b>0.0142</b>         |
| <i>COMT</i>   | rs4680       | G / A                          | 49.8             | 24.82                                | 0.02             | 0.8887           | 0.9102                |
| <i>FADS1</i>  | rs174546     | C / T                          | 46.43            | 10.54                                | 1.848            | 0.174            | 0.1864                |
| <i>FTO</i>    | rs9939609    | T / A                          | 50.04            | 18.05                                | 0.525            | 0.4689           | 0.4913                |
| <i>FTO</i>    | rs1121980    | C / T                          | 49.68            | 21.16                                | 0                | 0.9981           | 1                     |
| <i>GC</i>     | rs2282679    | A / C                          | 38.44            | 7.58                                 | 0.512            | 0.4742           | 0.472                 |
| <i>GC</i>     | rs4588       | C / A                          | 40.86            | 7.92                                 | 0.042            | 0.838            | 0.8898                |
| <i>GC</i>     | rs7041       | G / T                          | 48.81            | 18.94                                | 0.048            | 0.8268           | 0.8189                |
| <i>GPX1</i>   | rs1050450    | C / T                          | 42.71            | 10.36                                | 0.243            | 0.6221           | 0.6482                |
| <i>GSTP1</i>  | rs1695       | G / A                          | 43.93            | 43.3                                 | 1.212            | 0.2709           | 0.2643                |
| <i>IRS1</i>   | rs1801278    | G / A                          | 13.4             | 0.56                                 | 0.023            | 0.88             | 0.8337                |
| <i>LIPC</i>   | rs10468017   | C / T                          | 40.33            | 7.45                                 | 0.099            | 0.7526           | 0.7786                |
| <i>MAOA</i>   | rs6323       | T / G                          | 25.54            | 18.4                                 | 206.679          | <b>&lt;0.001</b> | <b>&lt;0.001</b>      |
| <i>MTHFR</i>  | rs1801133    | C / T                          | 44.42            | 10.93                                | 0.007            | 0.932            | 0.9495                |
| <i>SLC6A4</i> | rs16965628   | G / C                          | 13.73            | 0.48                                 | 0.107            | 0.7433           | 1                     |

**Table S1. Cont.**

|               |           |       |       |       |       |        |        |
|---------------|-----------|-------|-------|-------|-------|--------|--------|
| <i>SOD2</i>   | rs4880    | T / C | 50.75 | 25.34 | 0.295 | 0.5872 | 0.612  |
| <i>TCF7L2</i> | rs7903146 | C / T | 42.11 | 7.22  | 1.847 | 0.1741 | 0.1874 |
| <i>TPH2</i>   | rs4570625 | G / T | 34.31 | 4.21  | 0.563 | 0.4529 | 0.5023 |
| <i>VDR</i>    | rs1544410 | G / A | 48.33 | 16.67 | 0     | 0.9919 | 1      |
| <i>VDR</i>    | rs2228570 | C / T | 47.27 | 14.89 | 0.005 | 0.9429 | 0.9526 |

† X<sup>2</sup> and p-value for Hardy-Weinberg equilibrium test

**Table S2.** QTL association analysis with multiple traits at baseline

|                                   | Additive effect |              | Dominant effect |              | Both† |                  |
|-----------------------------------|-----------------|--------------|-----------------|--------------|-------|------------------|
|                                   | F               | p            | F               | p            | F     | p                |
| <i>BMI (kg/m<sup>2</sup>)</i>     |                 |              |                 |              |       |                  |
| rs9939609                         | 5.85            | <b>0.016</b> | 0               | 0.961        | 3.02  | <b>0.049</b>     |
| rs1801133                         | 0.24            | 0.622        | 6.11            | <b>0.014</b> | 3.31  | <b>0.037</b>     |
| rs4570625                         | 4.76            | <b>0.029</b> | 2.53            | 0.112        | 2.38  | 0.093            |
| rs6564851                         | 5.01            | <b>0.025</b> | 0.03            | 0.873        | 2.51  | 0.082            |
| <i>Waist circumference (m)</i>    |                 |              |                 |              |       |                  |
| rs9939609                         | 5.3             | <b>0.021</b> | 0.98            | 0.323        | 2.79  | 0.062            |
| rs1801133                         | 0.72            | 0.397        | 7.47            | <b>0.006</b> | 3.83  | <b>0.022</b>     |
| rs4570625                         | 6.78            | <b>0.009</b> | 2.31            | 0.129        | 3.51  | <b>0.03</b>      |
| <i>Glucose (mmol/L)</i>           |                 |              |                 |              |       |                  |
| rs1042714                         | 10.51           | <b>0.001</b> | 2.7             | 0.101        | 5.44  | <b>0.004</b>     |
| rs16965628                        | 4.15            | <b>0.042</b> | 3.99            | <b>0.046</b> | 2.12  | 0.121            |
| rs2282679                         | 0.81            | 0.368        | 4.18            | <b>0.041</b> | 2.15  | 0.117            |
| rs4680                            | 5.55            | <b>0.019</b> | 1.85            | 0.175        | 3.73  | <b>0.024</b>     |
| <i>Total cholesterol (mmol/L)</i> |                 |              |                 |              |       |                  |
| rs7903146                         | 6.11            | <b>0.014</b> | 0.59            | 0.444        | 3.41  | <b>0.033</b>     |
| rs7412                            | 5.18            | <b>0.023</b> | 10.22           | <b>0.001</b> | 8.73  | <b>&lt;0.001</b> |
| rs1050450                         | 6.05            | <b>0.014</b> | 7.26            | <b>0.007</b> | 4.53  | <b>0.011</b>     |
| <i>Total carotenoids (μmol/L)</i> |                 |              |                 |              |       |                  |
| rs7412                            | 1.18            | 0.278        | 0.05            | 0.823        | 4.3   | <b>0.014</b>     |
| rs662799                          | 4.95            | <b>0.026</b> | 2.03            | 0.154        | 3.22  | <b>0.04</b>      |
| <i>Omega3 index (AU)</i>          |                 |              |                 |              |       |                  |
| rs2228570                         | 5.86            | <b>0.016</b> | 0.01            | 0.928        | 3.17  | <b>0.042</b>     |
| rs4880                            | 0.68            | 0.411        | 5.52            | <b>0.019</b> | 3.17  | <b>0.042</b>     |

† Analysis assuming that both effects are equal to zero, which is equivalent to comparing means across the three possible genotypes and phenotypes. AU: Arbitrary units. QTL: Quantitative Trait Locus.
